# Supplementary material
Source: PubMed Central journal article supplement (PMC3162248)
Supplement: NIHMS317103-supplement-Figure_S1.pdf [file NIHMS317103-supplement-Figure_S1.pdf]

# Figure S1

|        | 1     | 50                                                  |
|--------|-------|-----------------------------------------------------|
| Nnna1  | (1)   | -----                                               |
| Nnna3  | (1)   | -----                                               |
| dNnna  | (1)   | -----                                               |
| yNnna2 | (1)   | MDPTKAPDFKPPQPNELQPPDPDTHIIPKSGPIVPIVVLADYNSSIDAPF  |
| mjNnna | (1)   | -----                                               |
|        | 51    | 100                                                 |
| Nnna1  | (1)   | -----                                               |
| Nnna3  | (1)   | -----                                               |
| dNnna  | (1)   | -----                                               |
| yNnna2 | (51)  | NLDIYKTLSSRKKGNANSSNRMDHIPLNTSDFPQLSRDVSSESEEGQSNQ  |
| mjNnna | (1)   | -----                                               |
|        | 101   | 150                                                 |
| Nnna1  | (1)   | -----                                               |
| Nnna3  | (1)   | -----                                               |
| dNnna  | (1)   | -----MIVKISWPKNNITSECFRRRFGSFKRRRSKSKQMSAFI         |
| yNnna2 | (101) | IDATLQDVTHMGNLGVLKSQIADLEEVPHTIVRQARTIEDYEFPVHRLTK  |
| mjNnna | (1)   | -----                                               |
|        | 151   | 200                                                 |
| Nnna1  | (1)   | -MDSSKKTVEVLLACGSPNPITNMHLRLPELAKQYMHATQKYSVIKGIIS  |
| Nnna3  | (1)   | ---MQNRIPVLLACGSPNPITNMHLRLPEVARDHLHQTRYQVIEGIIIS   |
| dNnna  | (37)  | EETKSLLPRIAFIACCGSPNPITNMHLRLPEIAKHQFEMQCTHRVVGIIIS |
| yNnna2 | (151) | KLQDPEKPLPIIVACGSPNPITNMHLRLPEALDDINEQTRFEVVGIIIS   |
| mjNnna | (1)   | -----                                               |
|        | 201   | 250                                                 |
| Nnna1  | (50)  | PVGDAYRKKGLIPWHRRIIMAEIATK-NSEHVEVDPEWESLQEGVETVKV  |
| Nnna3  | (48)  | PVNDSTGKRDIVASHIRVAMARLALQ-TSDNIRVDPEWESLQEGVETVKV  |
| dNnna  | (87)  | PTHDSYQKGLASALDFCAVWKLATQ-SNNIRLSDFEVHONQVMTQAV     |
| yNnna2 | (201) | PVSDNYQKGLAPAVIPVRMCEIACERTSSMLMVDWESLQSSYTRTKV     |
| mjNnna | (1)   | -----MRGFIIGRFQPFPHKGLVIRK                          |
|        | 251   | 300                                                 |
| Nnna1  | (99)  | LDYHQEKLATGSCSYQSSPALEKPKRKRKADQKQDSSPQKPEPKPTG     |
| Nnna3  | (97)  | LRHHHRELLRSSACMDQPDPSKTPSAS-----AA                  |
| dNnna  | (136) | LQHQNYINNHINSGGGGDDGENTHLPGLFRGLHDS-----RD          |
| yNnna2 | (251) | LQHFNHINIKR----GINTVDGEKMG-----                     |
| mjNnna | (23)  | IAEEVDEIIGIGSAQKSHLTLENPFTAG-----                   |
|        | 301   | 350                                                 |
| Nnna1  | (149) | VPKVKLLCGADLLESESVNLRWEDITQIVANFGLICITRAGSDAQKFI    |
| Nnna3  | (126) | LPKVKLLCGADVLRKTSQTPNLWKTTHIQEIVEKFGVVCVSRSDHDPERYI |
| dNnna  | (176) | PVHLKLLCGADLLESEAVPGLWAEADIEDIVANHGIVVITRAGSNPGRFI  |
| yNnna2 | (275) | -VKIMLACGDLIESEMGEPVWADSLLHHLGNVCLIVERTGSDVRSIL     |
| mjNnna | (51)  | ERIDMITQSLKDYDLTYPIPIKQIEFNSHWVSYESLTPPFDIVYSGNP    |
|        | 351   | 400                                                 |
| Nnna1  | (199) | YESDVLWRHDSNIRVNEWITNLSSTKIRRALRRQSIIRYVVDLQBE      |
| Nnna3  | (176) | SDSFIILQQFQHNHAREPVLNEISATYVFKALGQQSWKYLLEAVITY     |
| dNnna  | (226) | FDSDIITKYQSNITLITNWVPEVSSILIRLLGRGQSWKYLLEDDLVEI    |
| yNnna2 | (324) | LSDIMYEHRRNLIKQLIYNDISSTKVELFIRGQSVQYLLNSVIFR       |
| mjNnna | (101) | LVRVLFEEERGYEVKRPPEMFRKQYSGTEIRRRMLNGEKWEHVEKAVDVF  |
|        | 401   | 437                                                 |
| Nnna1  | (249) | IEKHELYNTESEGRNAGVTLAPLQRNAEAKHNHSTL                |
| Nnna3  | (226) | IRDQQLYINDGSWKGKGTG-----                            |
| dNnna  | (276) | IKRQRFNFKGRDAPAPTECDS-----                          |
| yNnna2 | (374) | IQEYNLYINQSEPVKQVLDSE-----                          |
| mjNnna | (151) | IKEIKGVERLRKLAQTK-----                              |
