# Supplementary material
Source: PubMed Central journal article supplement (PMC3162248)

Figure S2

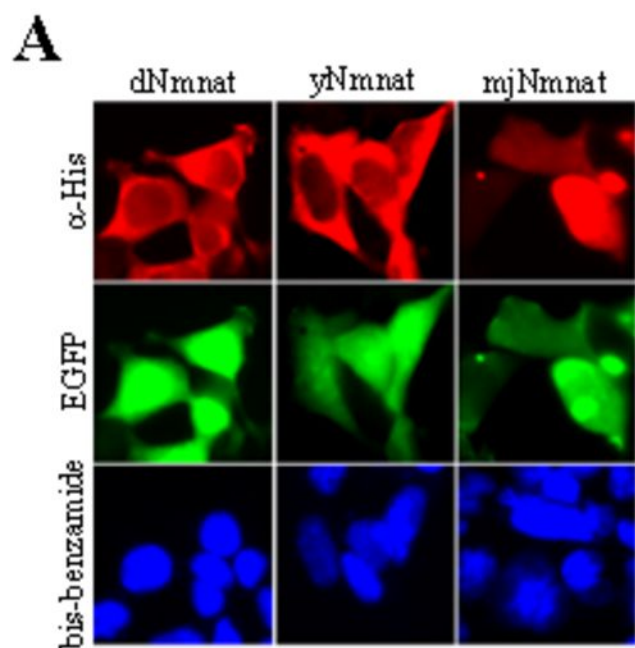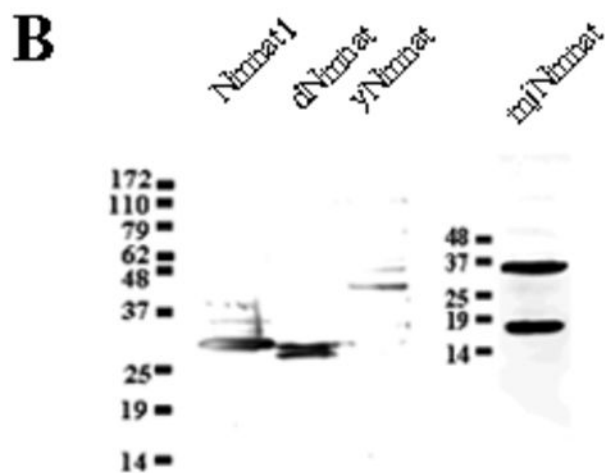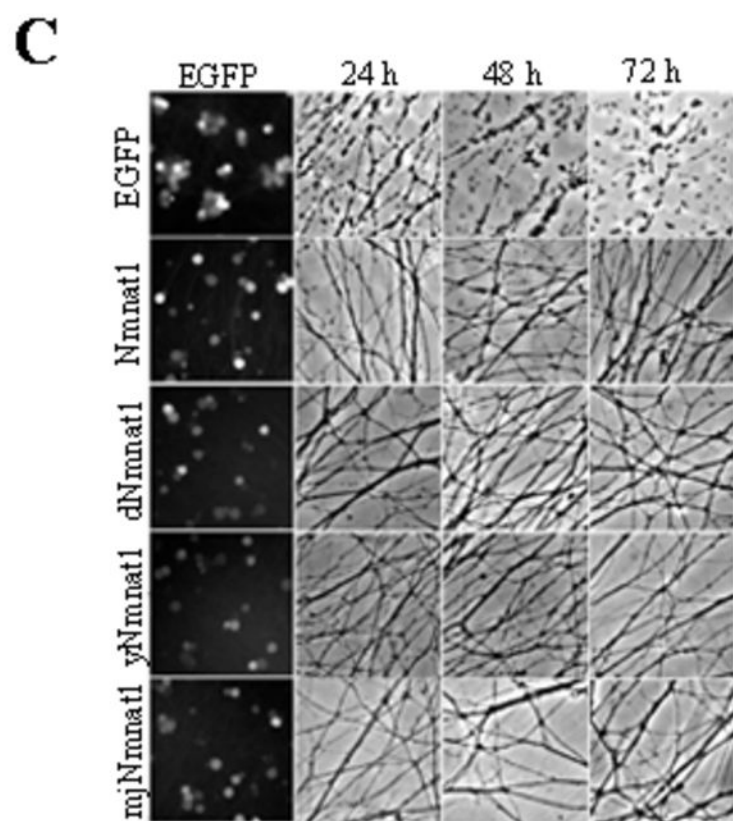

Supplement: NIHMS317103-supplement-Figure_S2.pdf [file NIHMS317103-supplement-Figure_S2.pdf]
